# Supplementary material
Source: PubMed Central journal article supplement (PMC10497073)
Supplement: NIHMS1892476-supplement-1.pdf [file NIHMS1892476-supplement-1.pdf]

- effect of consanguinity on between-individual-identity-by-descent sharing. *Genetics* 212:305–316.
- Severson, A. L., S. Carmi, and N. A. Rosenberg. 2021. Variance and limiting distribution of coalescence times in a diploid model of a consanguineous population. *Theor. Popul. Biol.* 139:50–65.
- Sharma, S. K., M. A. Kalam, S. Ghosh et al. 2021. Prevalence and determinants of consanguineous marriage and its types in India: Evidence from the National Family Health Survey, 2015–2016. *J. Biosoc. Sci.* 53:566–576.
- Sheridan, E., J. Wright, N. Small et al. 2013. Risk factors for congenital anomaly in a multiethnic birth cohort: An analysis of the Born in Bradford study. *Lancet* 382:1,350–1,359.
- Stone, L. 1977. *Family, Sex and Marriage in England 1500–1800*. New York: Harper and Row.
- Szpiech, Z. A., J. Xu, T. J. Pemberton et al. 2013. Long runs of homozygosity are enriched for deleterious variation. *Am. J. Hum. Genet.* 93:90–102.
- Wall, J. D., J. F. Sathirapongsasuti, R. Gupta et al. 2020. South Asian patient population genetics reveal strong founder effects and high rates of homozygosity—New resources for precision medicine. Preprint, <https://www.biorxiv.org/content/10.1101/2020.10.02.323238v1>.

### Supplementary Table S1. Quasi-Poisson Regression Fitted for Long (>10 cM) Runs of Homozygosity (NROH10; cM) for Populations (Unweighted)

| Predictor Variable      | Estimate | Std. Error | t-Value | Pr(> t ) |
|-------------------------|----------|------------|---------|----------|
| Intercept               | 3.99     | 2.52       | 1.58    | 1.14e-01 |
| NROH2                   | 0.07     | 0.01       | 7.12    | 5.51e-12 |
| NROH1                   | -0.06    | 0.02       | -2.67   | 8.00e-03 |
| Heterozygosity          | -11.76   | 6.71       | -1.75   | 8.06e-02 |
| Consanguinity score = 1 | 0.29     | 0.20       | 1.46    | 1.45e-01 |
| Consanguinity score = 2 | 0.78     | 0.14       | 5.63    | 3.47e-08 |

Abbreviations: NROH1, number of runs of homozygosity longer than 1 cM but shorter than 2 cM; NROH2, number of runs of homozygosity longer than 2 cM but shorter than 5 cM. Consanguinity scores of 1 and 2 represent populations that permit and prefer cousin unions, respectively. Ten genetic PCs (calculated for the full sample) were also included in the model, but their beta coefficients are not shown. Poisson dispersion parameter = 1.57,  $p$ -value =  $1.13 \times 10^{-11}$ .

### Supplementary Table S2. Poisson Regression Fitted for Long (>10 cM) Runs of Homozygosity (NROH10; cM) for Populations (Weighted)

| Predictor Variable      | Estimate | Std. Error | z-Value | Pr(> z ) |
|-------------------------|----------|------------|---------|----------|
| Intercept               | 0.31     | 2.42       | 0.13    | 8.97e-01 |
| NROH2                   | 0.08     | 0.01       | 6.79    | 1.14e-11 |
| NROH1                   | -0.04    | 0.02       | -1.84   | 6.53e-02 |
| Heterozygosity          | -2.30    | 6.39       | -0.36   | 7.20e-01 |
| Consanguinity score = 1 | 0.27     | 0.15       | 1.79    | 7.41e-02 |
| Consanguinity score = 2 | 0.76     | 0.12       | 6.44    | 1.22e-10 |

Abbreviations: NROH1, number of runs of homozygosity longer than 1 cM but shorter than 2 cM; NROH2, number of runs of homozygosity longer than 2 cM but shorter than 5 cM. Consanguinity scores of 1 and 2 represent populations that permit and prefer cousin unions, respectively. Ten genetic PCs (calculated for the full sample) were also included in the model, but their beta coefficients are not shown. Poisson dispersion parameter = 1.06,  $p$ -value = 0.201.

**Supplementary Table S3. Quasi-Poisson Regression Fitted for Long (>10 cM) Runs of Homozygosity (NROH10; cM) in South Asian Individuals**

| Predictor Variable      | Estimate | Std. Error | t-Value | Pr(> t ) |
|-------------------------|----------|------------|---------|----------|
| Intercept               | 7.9779   | 3.3975     | 2.35    | 0.0190   |
| NROH1                   | -0.0655  | 0.0157     | -4.16   | 0.0000   |
| NROH2                   | 0.0744   | 0.0079     | 9.44    | 0.0000   |
| Heterozygosity          | -23.4837 | 9.0324     | -2.60   | 0.0094   |
| Consanguinity score = 1 | 0.4268   | 0.2129     | 2.00    | 0.0452   |
| Consanguinity score = 2 | 1.1840   | 0.1695     | 6.98    | 0.0000   |

Abbreviations: NROH1, number of runs of homozygosity longer than 1 cM but shorter than 2 cM; NROH2, number of runs of homozygosity longer than 2 cM but shorter than 5 cM. Consanguinity scores of 1 and 2 represent populations that permit and prefer cousin unions, respectively. Ten genetic PCs (calculated in South Asians only) were also included in the model, but their beta coefficients are not shown. Poisson dispersion parameter = 5.17, p-value = 0.

**Supplementary Table S4. Quasi-Poisson Regression Fitted for Long (>10 cM) Runs of Homozygosity (NROH10; cM) in South Asian Populations (Unweighted)**

| Predictor Variable      | Estimate | Std. Error | t-Value | Pr(> t ) |
|-------------------------|----------|------------|---------|----------|
| Intercept               | 21.18    | 6.37       | 3.33    | 1.08e-03 |
| NROH2                   | 0.17     | 0.03       | 6.82    | 1.70e-10 |
| NROH1                   | -0.24    | 0.04       | -5.48   | 1.60e-07 |
| Heterozygosity          | -57.14   | 17.01      | -3.36   | 9.74e-04 |
| Consanguinity score = 1 | 0.15     | 0.34       | 0.45    | 6.55e-01 |
| Consanguinity score = 2 | 0.93     | 0.24       | 3.87    | 1.56e-04 |

Abbreviations: NROH1, number of runs of homozygosity longer than 1 cM but shorter than 2 cM; NROH2, number of runs of homozygosity longer than 2 cM but shorter than 5 cM. Consanguinity scores of 1 and 2 represent populations that permit and prefer cousin unions, respectively. Ten genetic PCs (calculated in South Asians only) were also included in the model, but their beta coefficients are not shown. Poisson dispersion parameter = 1.6, p-value =  $1.53 \times 10^{-6}$ .

**Supplementary Table S5. Poisson Regression Fitted for Long (>10 cM) Runs of Homozygosity (NROH10; cM) in South Asian Populations (Weighted)**

| Predictor Variable      | Estimate | Std. Error | z-Value | Pr(> z ) |
|-------------------------|----------|------------|---------|----------|
| Intercept               | 19.1731  | 6.4089     | 2.99    | 0.0028   |
| NROH2                   | 0.1212   | 0.0278     | 4.36    | 0.0000   |
| NROH1                   | -0.1396  | 0.0459     | -3.04   | 0.0024   |
| Heterozygosity          | -52.5470 | 16.9158    | -3.11   | 0.0019   |
| Consanguinity score = 1 | 0.3571   | 0.2635     | 1.36    | 0.1754   |
| Consanguinity score = 2 | 0.9184   | 0.1921     | 4.78    | 0.0000   |

Abbreviations: NROH1, number of runs of homozygosity longer than 1 cM but shorter than 2 cM; NROH2, number of runs of homozygosity longer than 2 cM but shorter than 5 cM. Consanguinity scores of 1 and 2 represent populations that permit and prefer cousin unions, respectively. Ten genetic PCs (calculated in South Asians only) were also included in the model, but their beta coefficients are not shown. Poisson dispersion parameter = 1.12, p-value = 0.131.

**Supplementary Table S6. Linear Regression Fitted for Total Length of Regions of Homozygosity Longer Than 10 cM (LROH10; cM) for Individuals**

| Predictor Variable           | Estimate | Std. Error | t-Value | Pr(> t ) |
|------------------------------|----------|------------|---------|----------|
| Intercept                    | 23.54    | 36.63      | 0.64    | 5.21e-01 |
| LROH1                        | -1.41    | 0.18       | -7.84   | 5.98e-15 |
| LROH2                        | 1.26     | 0.06       | 21.46   | 1.58e-96 |
| Heterozygosity               | -176.49  | 87.25      | -2.02   | 4.32e-02 |
| Consanguinity score = 1      | 0.33     | 2.72       | 0.12    | 9.05e-01 |
| Consanguinity score = 2      | 21.23    | 2.18       | 9.75    | 3.23e-22 |
| Central Asia and Siberia     | 49.40    | 15.61      | 3.17    | 1.56e-03 |
| East Asia                    | 46.13    | 16.19      | 2.85    | 4.41e-03 |
| Middle East and North Africa | 52.30    | 16.55      | 3.16    | 1.59e-03 |
| Oceania                      | 58.92    | 47.88      | 1.23    | 2.19e-01 |
| South Asia                   | 56.21    | 16.27      | 3.46    | 5.55e-04 |
| Sub-Saharan Africa           | 83.28    | 23.21      | 3.59    | 3.38e-04 |
| Western Eurasia              | 38.07    | 15.87      | 2.40    | 1.65e-02 |

Abbreviations: LROH1, total length of runs of homozygosity longer than 1 cM but shorter than 2 cM; LROH2, total length of runs of homozygosity longer than 2 cM but shorter than 5 cM. Consanguinity scores of 1 and 2 represent populations that permit and prefer cousin unions, respectively. Ten genetic PCs (calculated for the full sample) were also included in the model but their beta coefficients are not shown.

**Supplementary Table S7. Linear Regression Fitted for Total Length of Regions of Homozygosity Longer Than 10 cM (LROH10; cM) for Populations (Unweighted)**

| Predictor Variable      | Estimate | Std. Error | t-Value | Pr(> t ) |
|-------------------------|----------|------------|---------|----------|
| Intercept               | 5.92     | 2.86       | 2.07    | 3.90e-02 |
| LROH2                   | 0.05     | 0.01       | 7.66    | 1.60e-13 |
| LROH1                   | -0.06    | 0.02       | -3.07   | 2.33e-03 |
| Heterozygosity          | -11.24   | 7.56       | -1.49   | 1.38e-01 |
| Consanguinity score = 1 | 0.01     | 0.22       | 0.06    | 9.50e-01 |
| Consanguinity score = 2 | 0.83     | 0.15       | 5.62    | 3.78e-08 |

Abbreviations: LROH1, total length of runs of homozygosity longer than 1 cM but shorter than 2 cM; LROH2, total length of runs of homozygosity longer than 2 cM but shorter than 5 cM. Consanguinity scores of 1 and 2 represent populations that permit and prefer cousin unions, respectively. Ten genetic PCs (calculated for the full sample) were also included in the model but their beta coefficients are not shown.

**Supplementary Table S8. Linear Regression Fitted for Total Length of Regions of Homozygosity Longer Than 10 cM (LROH10; cM) for Populations (Weighted)**

| Predictor Variable      | Estimate | Std. Error | t-Value | Pr(> t ) |
|-------------------------|----------|------------|---------|----------|
| Intercept               | 147.52   | 73.36      | 2.01    | 4.50e-02 |
| LROH2                   | 1.63     | 0.17       | 9.44    | 3.97e-19 |
| LROH1                   | -2.56    | 0.58       | -4.44   | 1.20e-05 |
| Heterozygosity          | -357.34  | 193.03     | -1.85   | 6.49e-02 |
| Consanguinity score = 1 | -0.72    | 4.49       | -0.16   | 8.73e-01 |
| Consanguinity score = 2 | 20.14    | 3.47       | 5.80    | 1.43e-08 |

Abbreviations: LROH1, total length of runs of homozygosity longer than 1 cM but shorter than 2 cM; LROH2, total length of runs of homozygosity longer than 2 cM but shorter than 5 cM. Consanguinity scores of 1 and 2 represent populations that permit and prefer cousin unions, respectively. Ten genetic PCs (calculated for the full sample) were also included in the model but their beta coefficients are not shown

**Supplementary Table S9. Linear Regression Model Fitted for Total Length of Regions of Homozygosity Longer Than 10 cM (LROH10; cM) in South Asian Individuals**

| Predictor Variable      | Estimate | Std. Error | t-Value | Pr(> t ) |
|-------------------------|----------|------------|---------|----------|
| Intercept               | 158.33   | 69.05      | 2.29    | 2.20e-02 |
| LROH1                   | -1.70    | 0.34       | -5.05   | 5.04e-07 |
| LROH2                   | 1.13     | 0.12       | 9.74    | 1.02e-21 |
| Heterozygosity          | -404.67  | 183.02     | -2.21   | 2.72e-02 |
| Consanguinity score = 1 | 0.32     | 5.10       | 0.06    | 9.50e-01 |
| Consanguinity score = 2 | 25.09    | 3.69       | 6.79    | 1.66e-11 |

Abbreviations: LROH1, total length of runs of homozygosity longer than 1 cM but shorter than 2 cM; LROH2, total length of runs of homozygosity longer than 2 cM but shorter than 5 cM. Consanguinity scores of 1 and 2 represent populations that permit and prefer cousin unions, respectively. Ten genetic PCs (calculated in South Asians only) were also included in the model but their beta coefficients are not shown.

**Supplementary Table S10. Linear Regression Model Fitted for Total Length of Long Runs of Homozygosity Longer Than 10 cM (LROH10; cM) in South Asian Populations (Unweighted)**

| Predictor Variable     | Estimate | Std. Error | t-Value | Pr(> t ) |
|------------------------|----------|------------|---------|----------|
| Intercept              | 707.06   | 219.89     | 3.22    | 1.57e-03 |
| LROH2                  | 2.23     | 0.35       | 6.45    | 1.18e-09 |
| LROH1                  | -6.95    | 1.20       | -5.79   | 3.52e-08 |
| Heterozygosity         | -1808.79 | 581.42     | -3.11   | 2.20e-03 |
| Consanguinity score =1 | -3.40    | 9.48       | -0.36   | 7.20e-01 |
| Consanguinity score =2 | 20.75    | 6.54       | 3.17    | 1.80e-03 |

Abbreviations: LROH1, total length of runs of homozygosity longer than 1 cM but shorter than 2 cM; LROH2, total length of runs of homozygosity longer than 2 cM but shorter than 5 cM. Consanguinity scores of 1 and 2 represent populations that permit and prefer cousin unions, respectively. Ten genetic PCs (calculated in South Asians only) were also included in the model but their beta coefficients are not shown.

**Supplementary Table S11. Linear Regression Model Fitted for Total Length of Long Runs of Homozygosity Longer Than 10 cM (LROH10; cM) for South Asia Populations (Weighted)**

| Predictor Variable      | Estimate | Std. Error | z-Value | Pr(> z ) |
|-------------------------|----------|------------|---------|----------|
| Intercept               | 19.17    | 6.41       | 2.99    | 2.78e-03 |
| LROH2                   | 0.12     | 0.03       | 4.36    | 1.28e-05 |
| LROH1                   | -0.14    | 0.05       | -3.04   | 2.38e-03 |
| Heterozygosity          | -52.55   | 16.92      | -3.11   | 1.89e-03 |
| Consanguinity score = 1 | 0.36     | 0.26       | 1.36    | 1.75e-01 |
| Consanguinity score = 2 | 0.92     | 0.19       | 4.78    | 1.74e-06 |

Abbreviations: LROH1, total length of runs of homozygosity longer than 1 cM but shorter than 2 cM; LROH2, total length of runs of homozygosity longer than 2 cM but shorter than 5 cM. Consanguinity scores of 1 and 2 represent populations that permit and prefer cousin unions, respectively. Ten genetic PCs (calculated in South Asians only) were also included in the model but their beta coefficients are not shown.

**Supplementary Table S12. Wilcoxon Signed-Rank Test Results for Differences between Pairs of Populations Preferring and Prohibiting Consanguinity (Outliers Removed)**

| Variable       | Wilcoxon Signed-Rank Sum | P-Value  |
|----------------|--------------------------|----------|
| NROH10         | 1469.50                  | 4.78e-03 |
| NROH5          | 1402.50                  | 3.51e-01 |
| NROH2          | 1486.00                  | 4.58e-01 |
| NROH1          | 1177.00                  | 3.42e-01 |
| Heterozygosity | 1408.00                  | 7.54e-01 |

Abbreviations: NROH10, number of runs of homozygosity longer than 10 cM; NROH5, number of runs of homozygosity longer than 5 cM but shorter than 10 cM; NROH2, number of runs of homozygosity longer than 2 cM but shorter than 5 cM; NROH1, number of runs of homozygosity longer than 1 cM but shorter than 2 cM.

**SUPPLEMENTARY DATA FILE S1.** Population-level data used to generate most of the results and figures in this study. The columns contain information such as latitude, longitude, and numbers of runs of homozygosity for each population (rows). The last column indicates the paired population used for the paired analysis. Go to the following link to download the file: [https://digitalcommons.wayne.edu/cgi/viewcontent.cgi?filename=0&article=1194&context=humbiol\\_preprints&type=additional](https://digitalcommons.wayne.edu/cgi/viewcontent.cgi?filename=0&article=1194&context=humbiol_preprints&type=additional)
